# Supplementary material for: Short-range disorder mediated stability of Zn in rock-salt MgO beyond configurational entropy
Source: Royal Society of Chemistry journal article supplement (doi:10.1039/d4ta02175d), 2024-01-01
Supplement: d4ta02175d1.pdf [file d4ta02175d1.pdf]

## Electronic Supplementary Information

### Short-range disorder mediated stability of Zn in rock-salt MgO beyond configurational entropy

Shengnan Sun<sup>1,†,\*</sup>, Jun Zhou<sup>1,†</sup>, Shibo Xi<sup>2,†</sup>, Hui Ru Tan<sup>1</sup>, Fengxia Wei<sup>1</sup>, Debbie Hwee Leng Seng<sup>1</sup>, Wei Ying Lieu<sup>1,3</sup>, Yi Ren<sup>1</sup>, Shijie Wang<sup>1,\*</sup> and Zhi Wei Seh<sup>1,\*</sup>

<sup>1</sup> Institute of Materials Research and Engineering (IMRE), Agency for Science, Technology and Research (A\*STAR), 2 Fusionopolis Way, Innovis #08-03, Singapore 138634, Republic of Singapore

<sup>2</sup> Institute of Sustainability for Chemicals, Energy and Environment (ISCE<sup>2</sup>), Agency for Science, Technology and Research (A\*STAR), 1 Pesek Road, Jurong Island, Singapore 627833, Republic of Singapore

<sup>3</sup> Pillar of Engineering Product Development, Singapore University of Technology and Design, 8 Somapah Road, Singapore 487372, Republic of Singapore

† S.S., J.Z. and S.X. contributed equally to this work.

\*Corresponding author. E-mail: sun\_shengnan@imre.a-star.edu.sg; sj-wang@imre.a-star.edu.sg; sehzw@imre.a-star.edu.sg

## Supplementary Figures and Tables

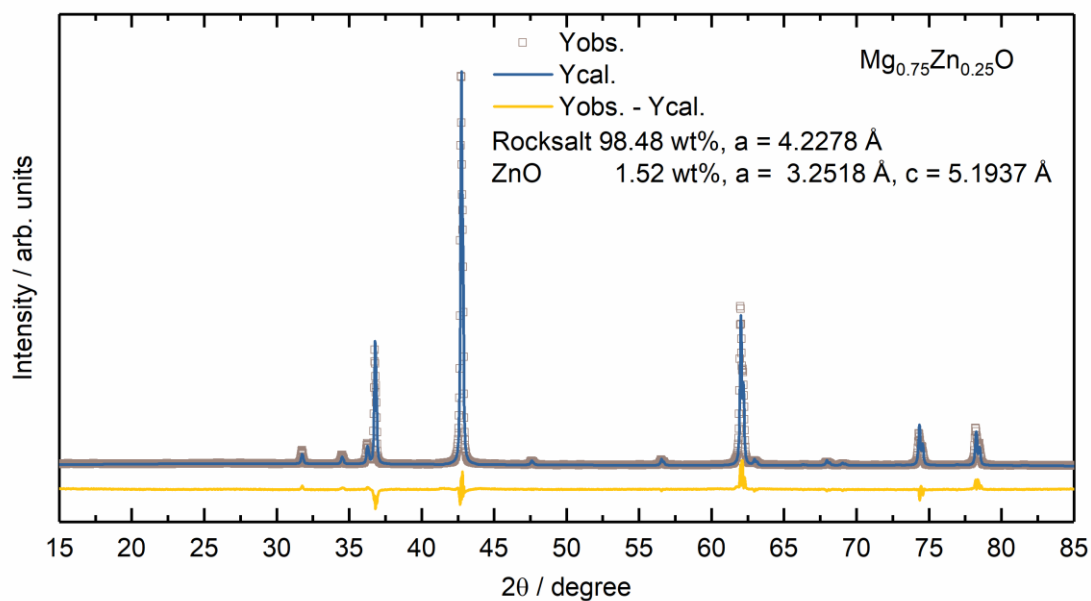

**Fig. S1.** XRD Rietveld refinement of  $\text{Mg}_{0.75}\text{Zn}_{0.25}\text{O}$ .

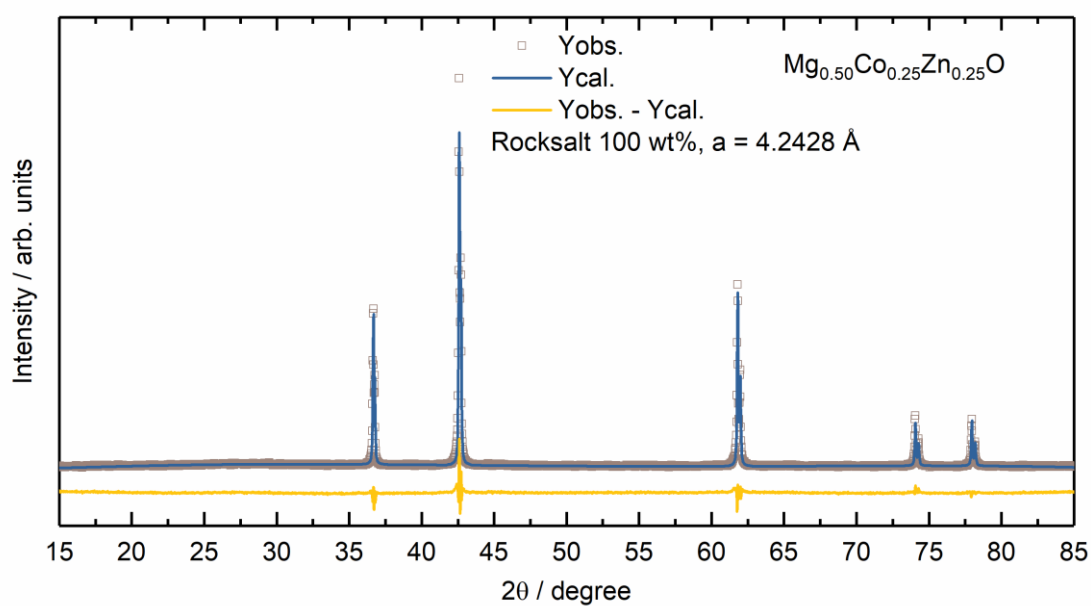

**Fig. S2.** XRD Rietveld refinement of  $\text{Mg}_{0.50}\text{Co}_{0.25}\text{Zn}_{0.25}\text{O}$ .

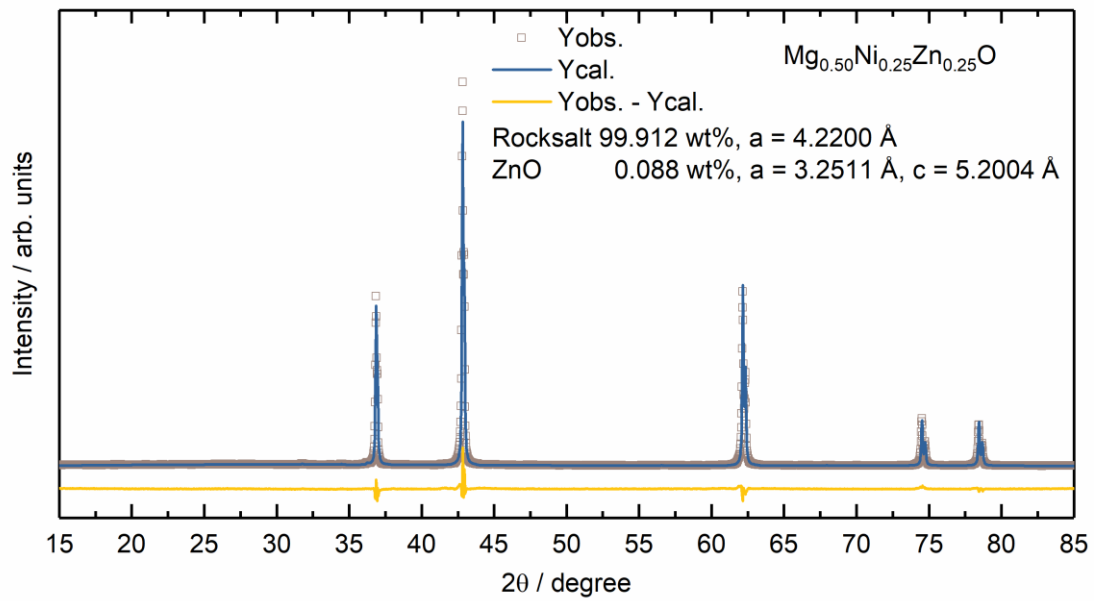

**Fig. S3.** XRD Rietveld refinement of  $\text{Mg}_{0.50}\text{Ni}_{0.25}\text{Zn}_{0.25}\text{O}$ .

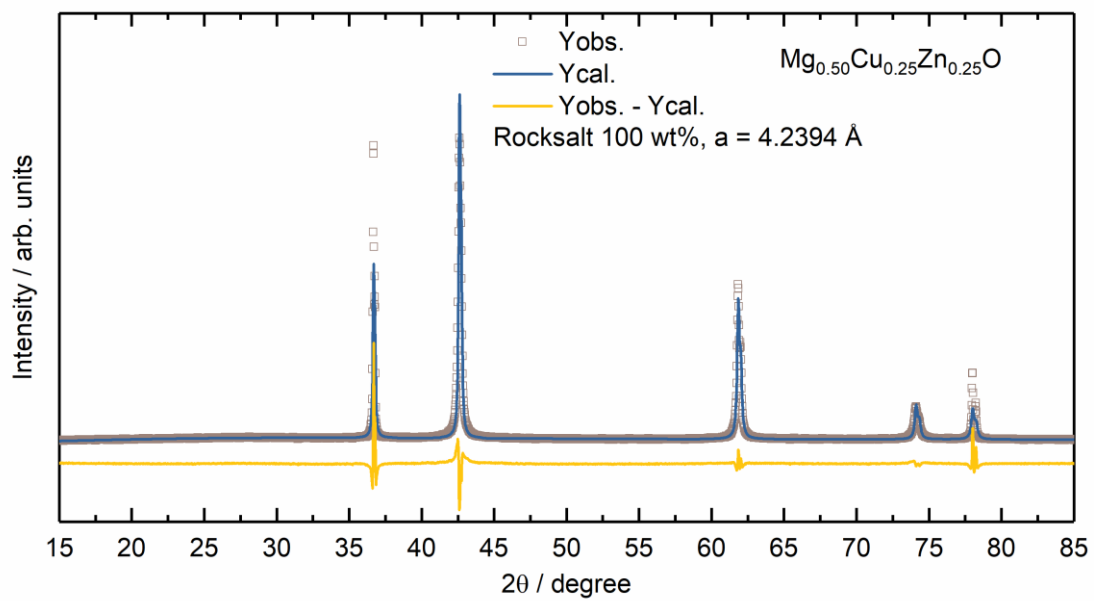

**Fig. S4.** XRD Rietveld refinement of  $\text{Mg}_{0.50}\text{Cu}_{0.25}\text{Zn}_{0.25}\text{O}$ .

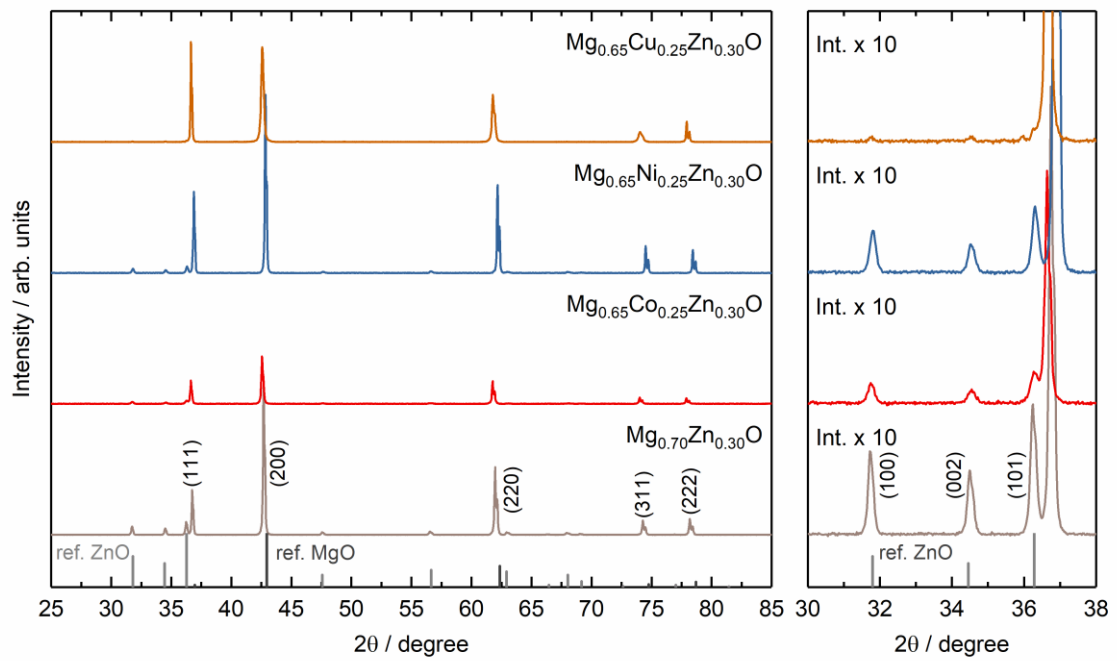

**Fig. S5.** The XRD patterns of  $\text{Mg}_{0.70}\text{Zn}_{0.30}\text{O}$  and  $\text{Mg}_{0.65}\text{TM}_{0.25}\text{Zn}_{0.30}\text{O}$  (TM = Co, Ni, Cu).

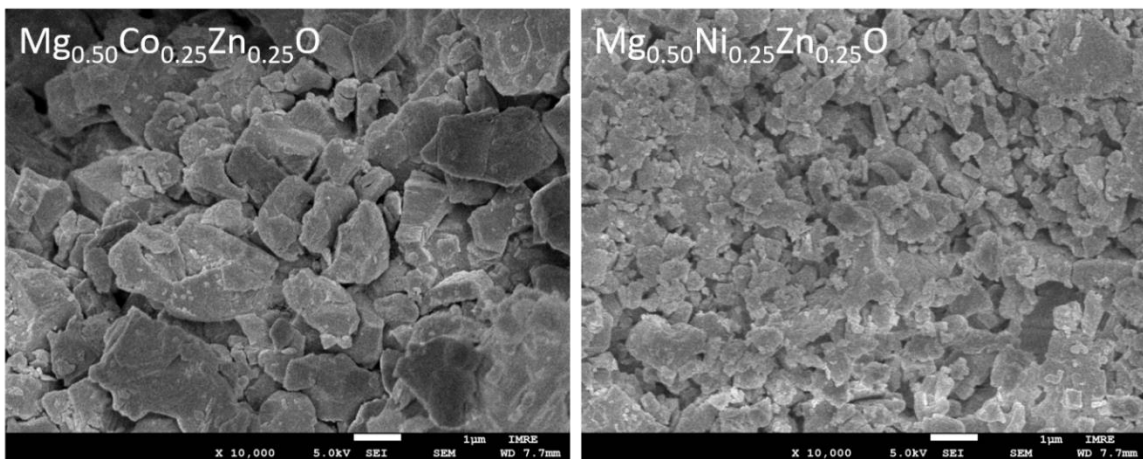

**Fig. S6.** The SEM images of  $\text{Mg}_{0.50}\text{Co}_{0.25}\text{Zn}_{0.25}\text{O}$  and  $\text{Mg}_{0.50}\text{Ni}_{0.25}\text{Zn}_{0.25}\text{O}$ .

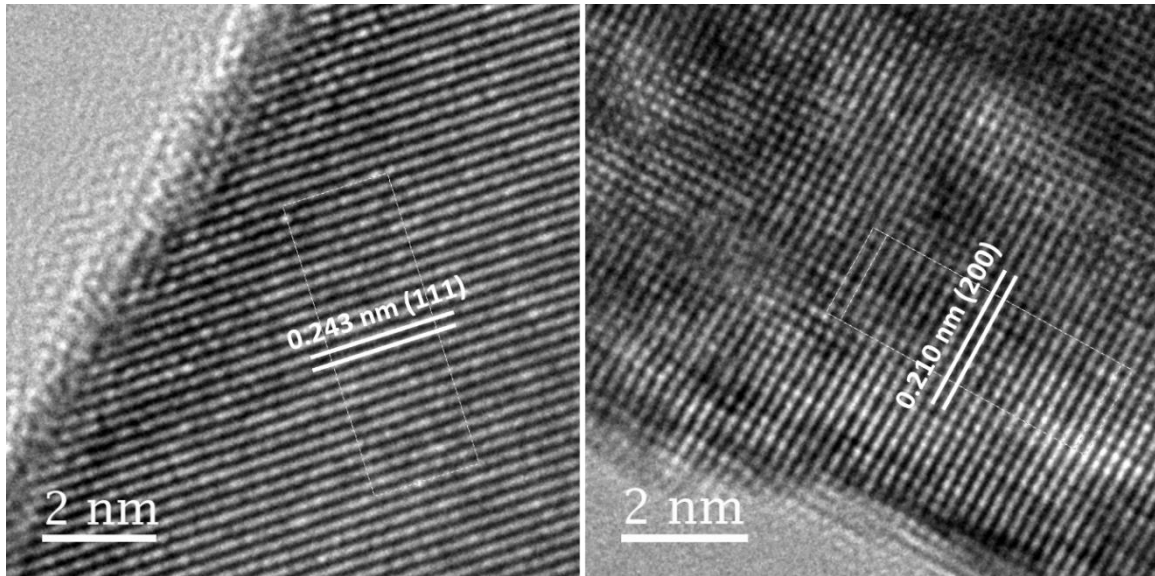

**Fig. S7.** HRTEM of (111) and (200) lattices in  $\text{Mg}_{0.50}\text{Cu}_{0.25}\text{Zn}_{0.25}\text{O}$ .

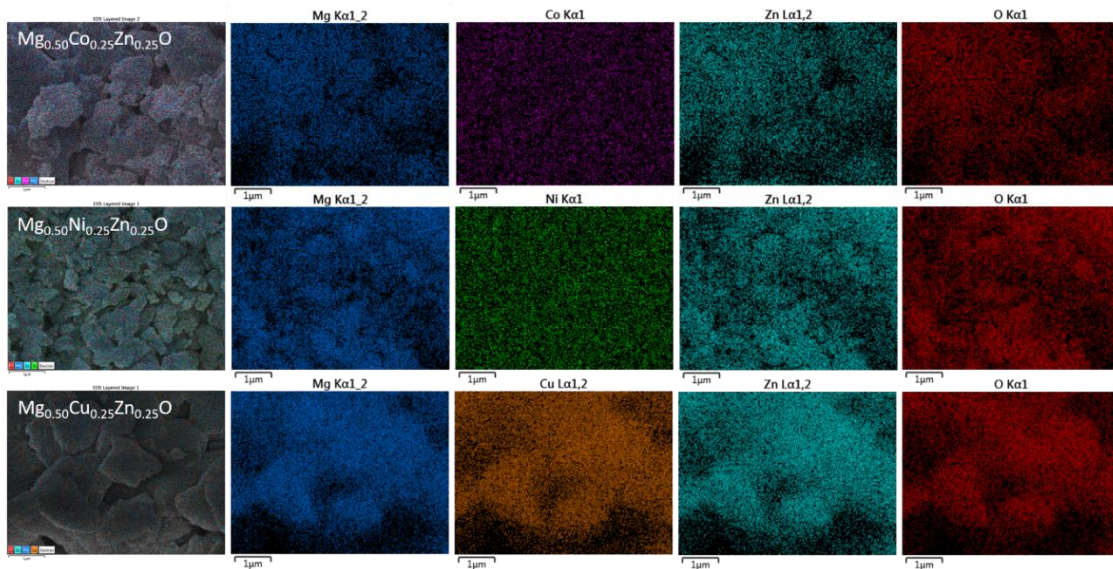

**Fig. S8.** SEM-EDX mapping of  $\text{Mg}_{0.50}\text{TM}_{0.25}\text{Zn}_{0.25}\text{O}$  (TM = Co, Ni, Cu).

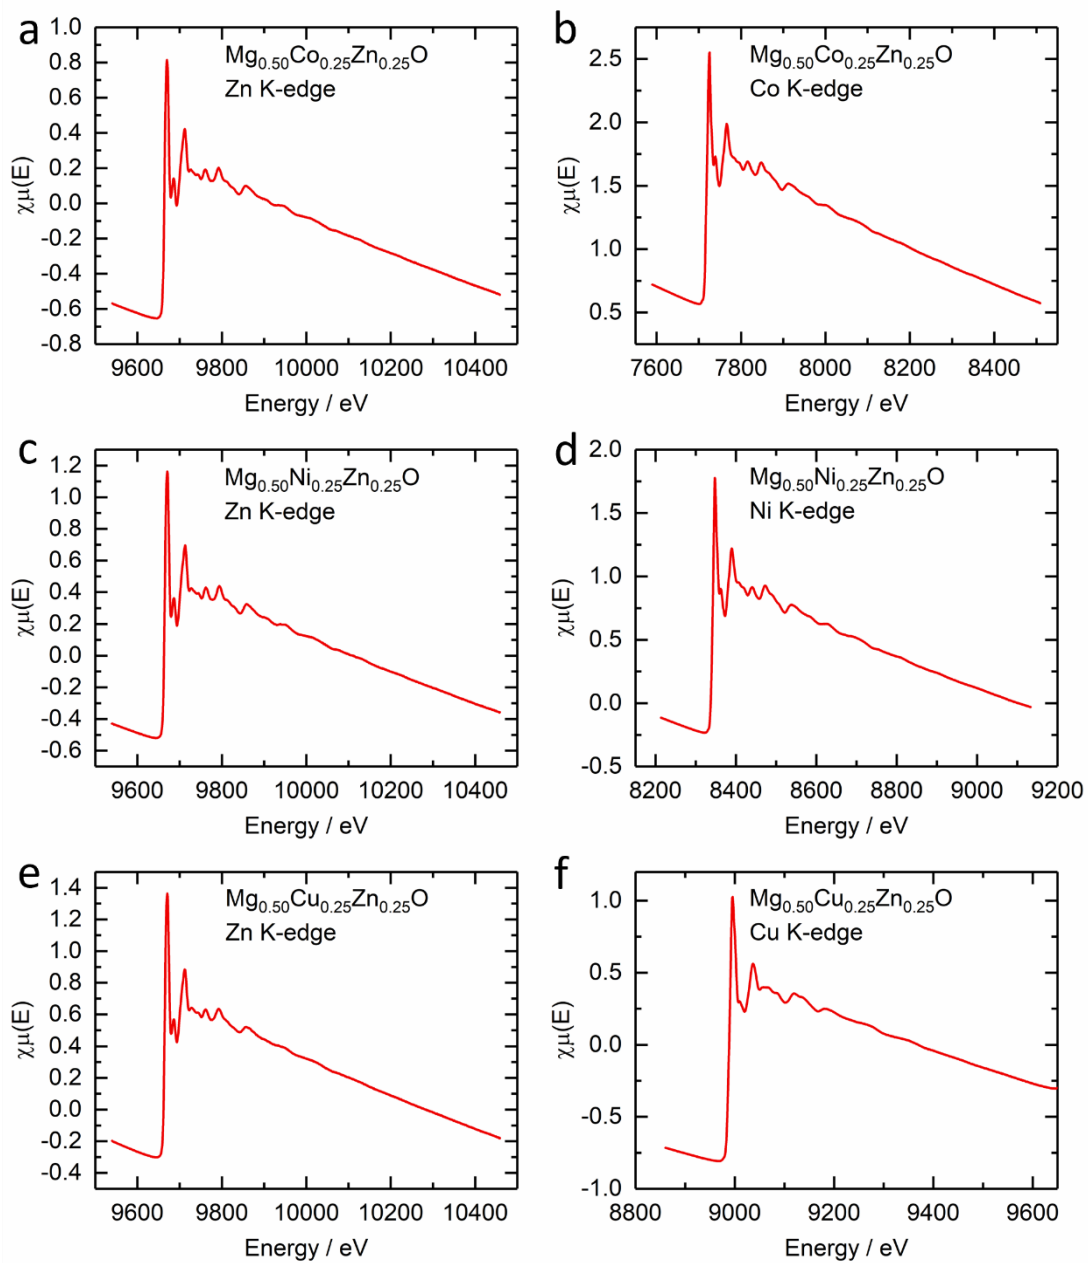

**Fig. S9.** The EXAFS experimental data of Zn, Co, Ni and Cu K-edges of  $\text{Mg}_{0.50}\text{Co}_{0.25}\text{Zn}_{0.25}\text{O}$ ,  $\text{Mg}_{0.50}\text{Ni}_{0.25}\text{Zn}_{0.25}\text{O}$  and  $\text{Mg}_{0.50}\text{Cu}_{0.25}\text{Zn}_{0.25}\text{O}$ .



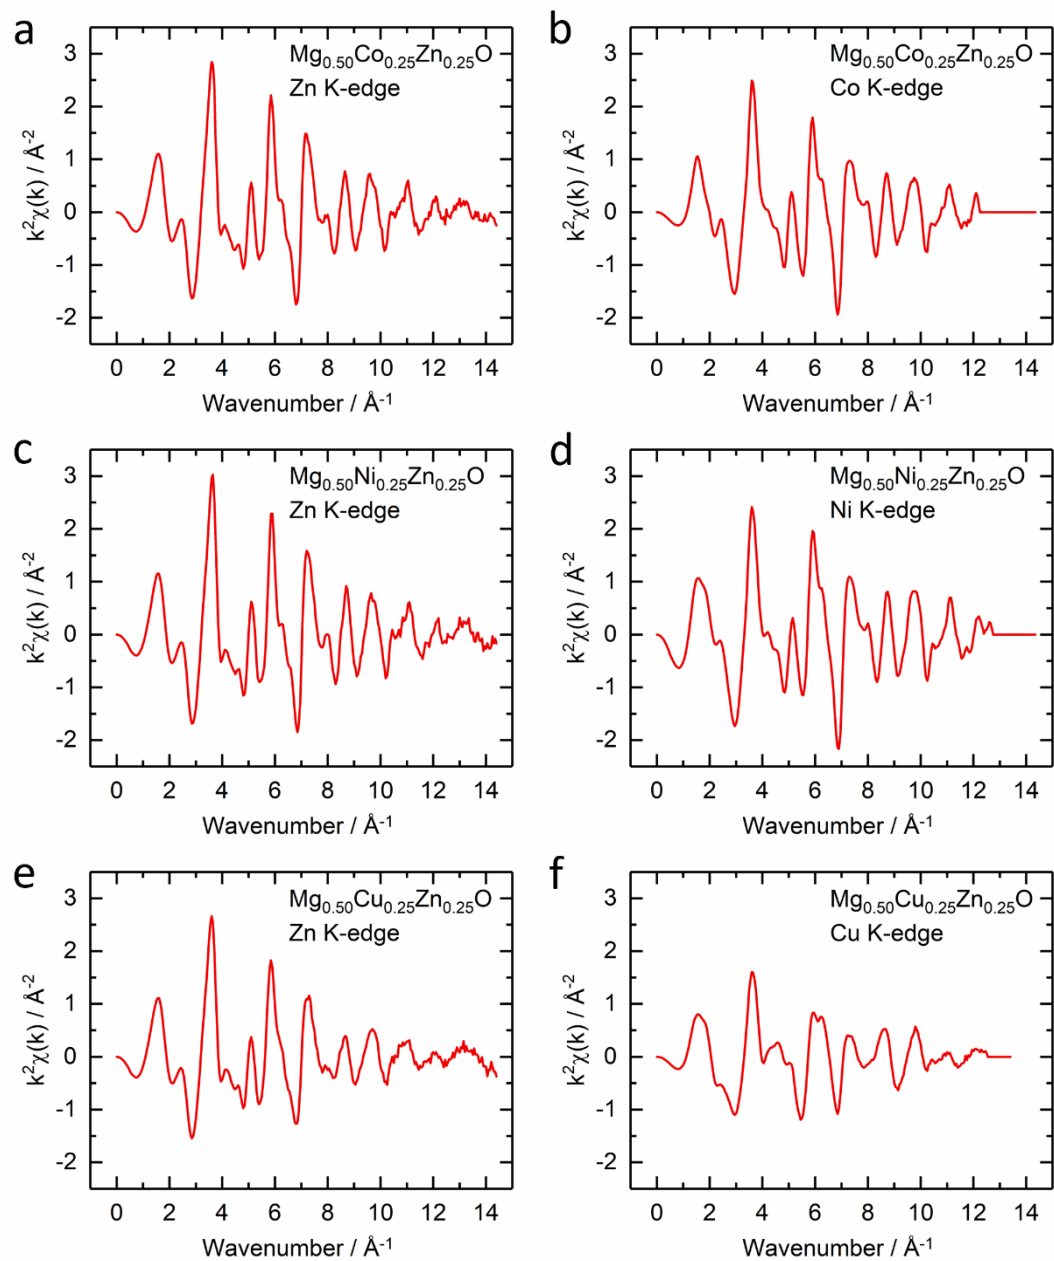

**Fig. S10.** The EXAFS data in k-space of Zn, Co, Ni and Cu K-edges of  $\text{Mg}_{0.50}\text{Co}_{0.25}\text{Zn}_{0.25}\text{O}$ ,  $\text{Mg}_{0.50}\text{Ni}_{0.25}\text{Zn}_{0.25}\text{O}$  and  $\text{Mg}_{0.50}\text{Cu}_{0.25}\text{Zn}_{0.25}\text{O}$ .

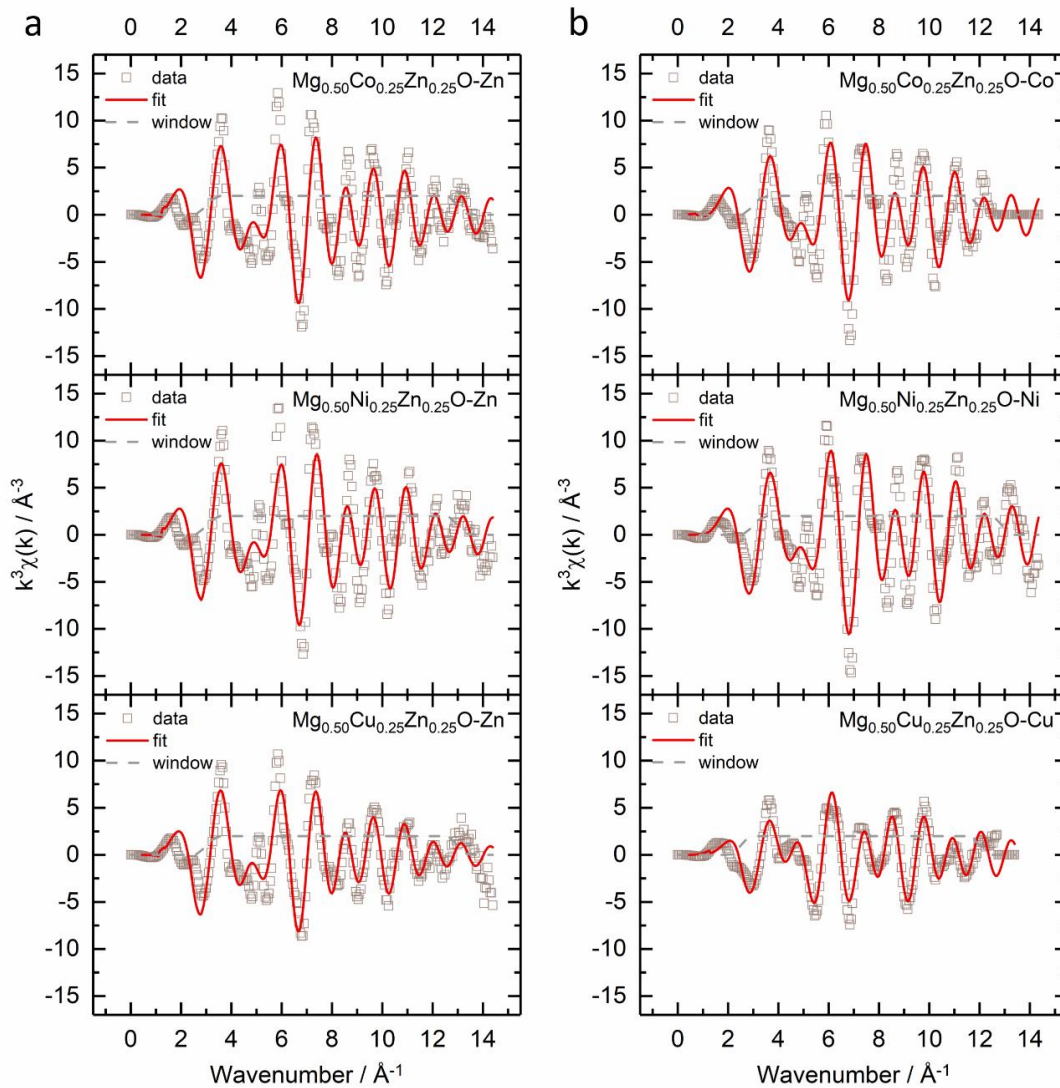

**Fig. S11.** The fitted EXAFS results of (a) Zn, (b) Co, Ni and Cu K-edges in k-space.



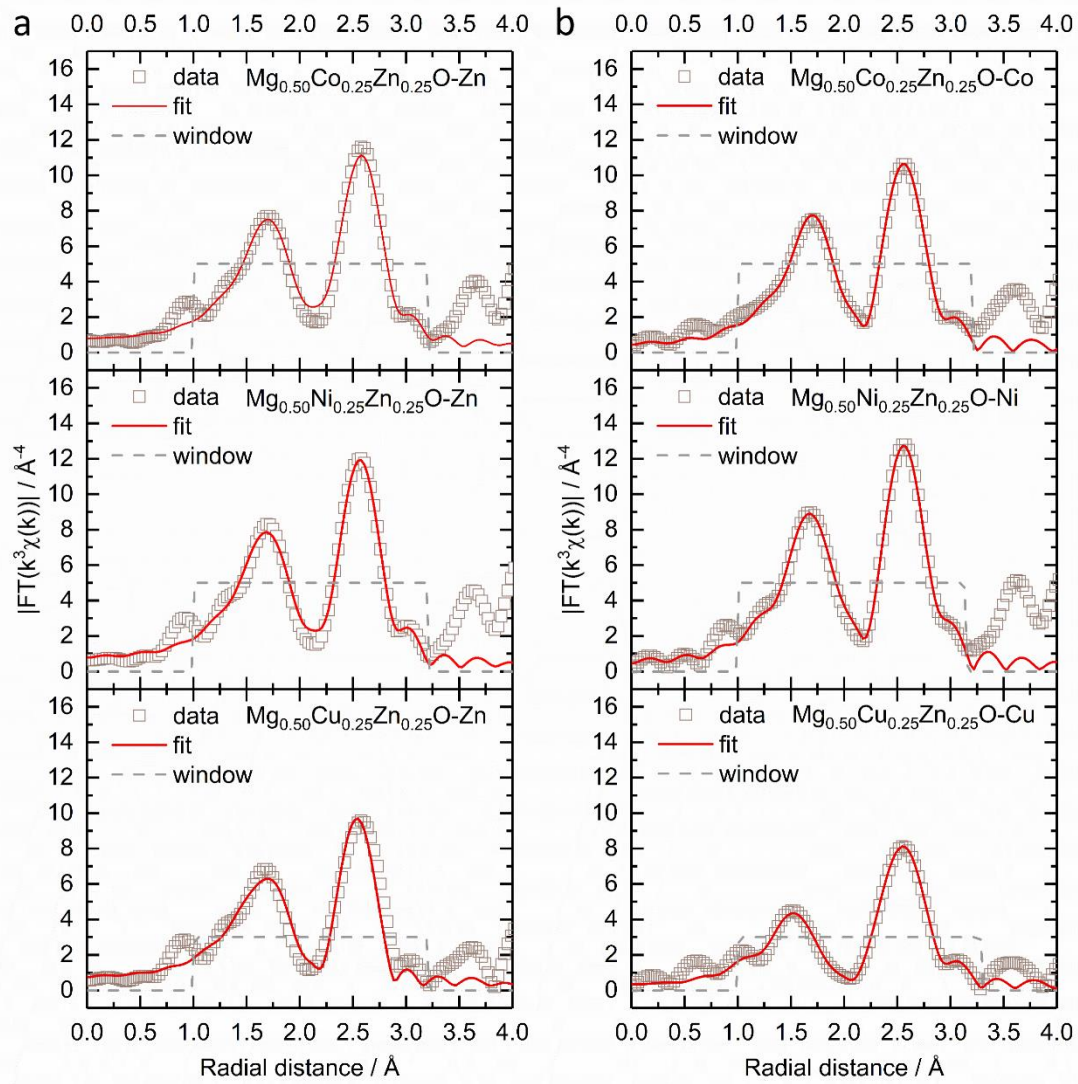

**Fig. S12.** The  $k^3$ -weighting FT-EXAFS and the fitting of (a) Zn K-edge and (b) Co, Ni and Cu K-edges of  $\text{Mg}_{0.50}\text{TM}_{0.25}\text{Zn}_{0.25}\text{O}$  (TM = Co, Ni, Cu) under a Hanning-shaped window, fixing the coordination number to 6 for the first shell and 12 for the second shell.

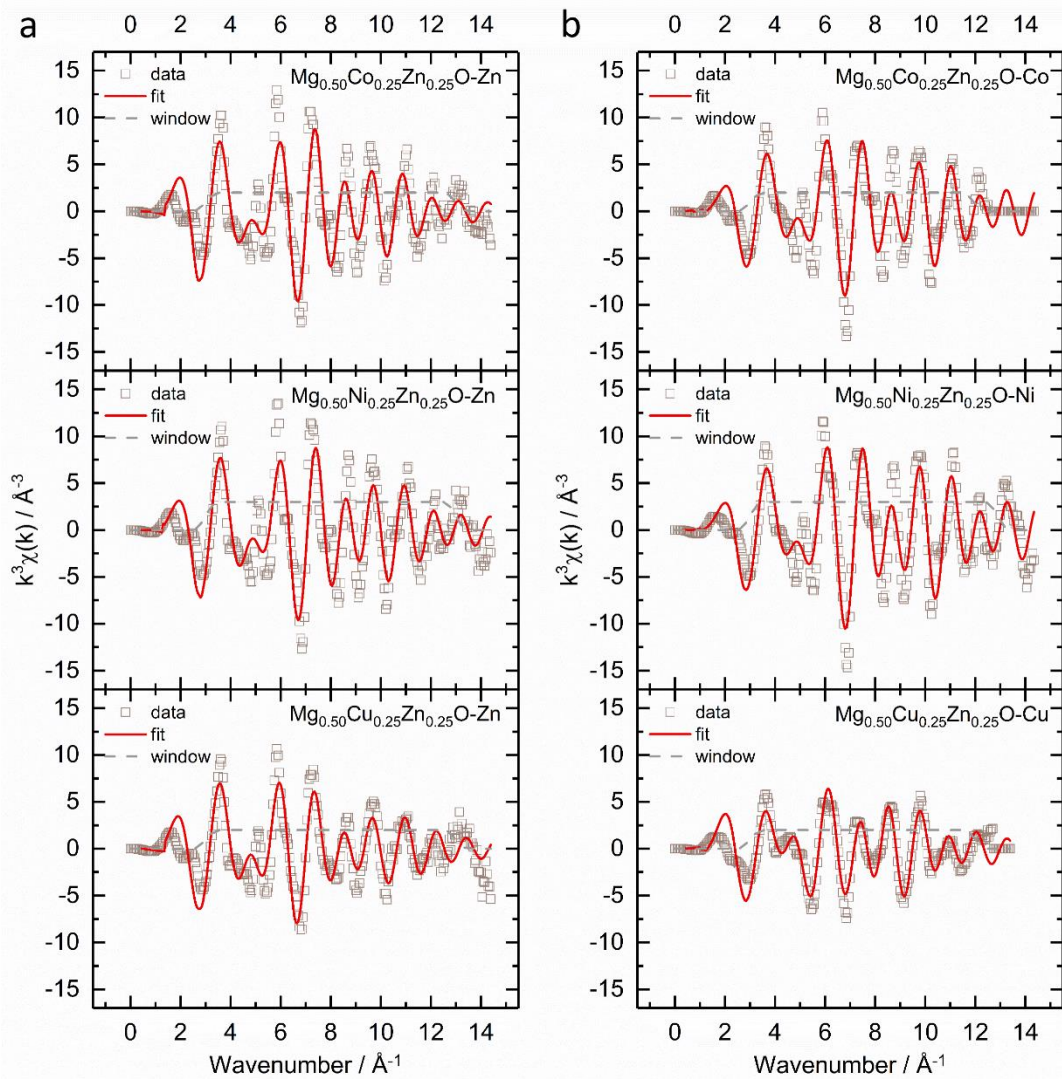

**Fig. S13.** The fitted EXAFS results of (a) Zn, (b) Co, Ni and Cu K-edges in k-space, fixing the coordination number to 6 for the first shell and 12 for the second shell.

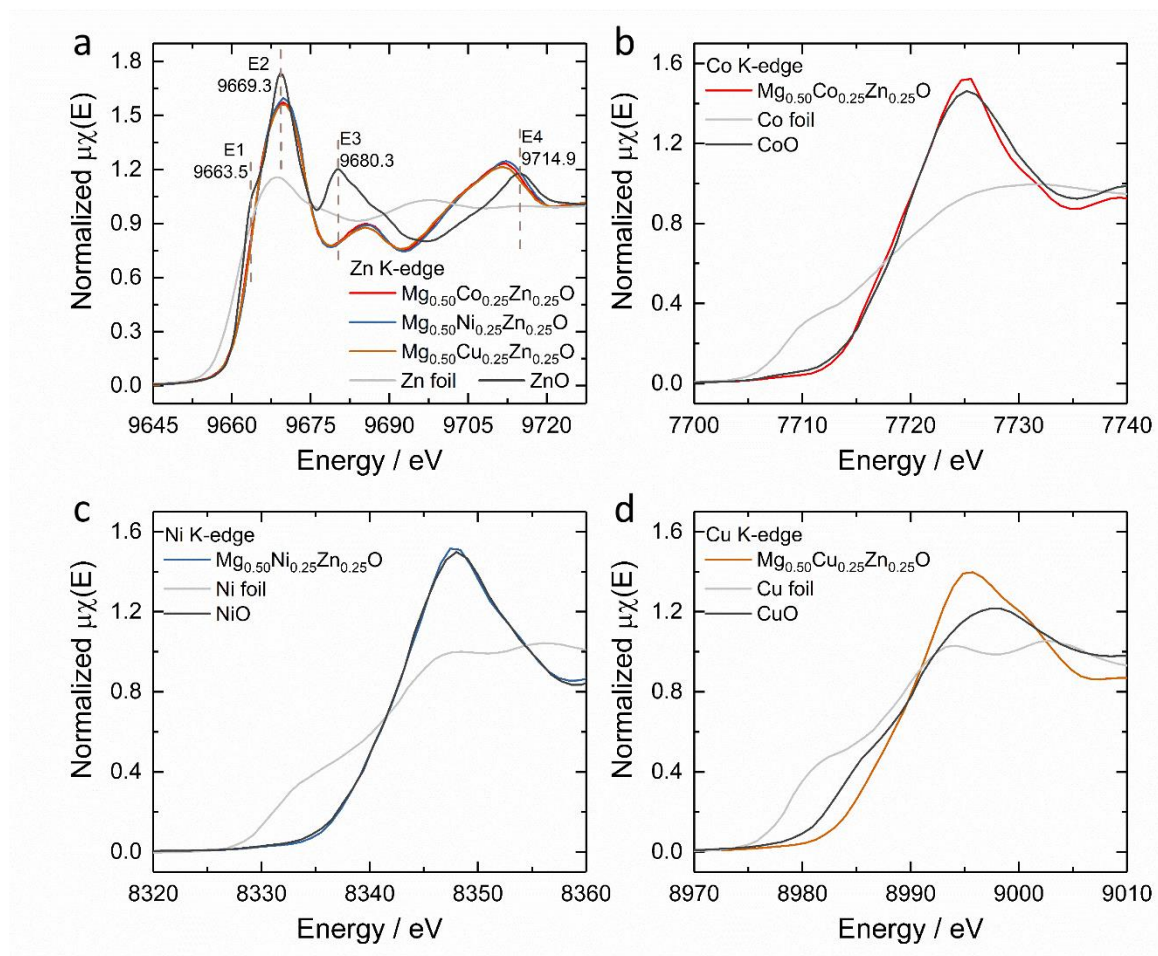

**Fig. S14.** XANES of (a) Zn, (b) Co, (c) Ni and (d) Cu in  $\text{Mg}_{0.50}\text{Co}_{0.25}\text{Zn}_{0.25}\text{O}$ ,  $\text{Mg}_{0.50}\text{Ni}_{0.25}\text{Zn}_{0.25}\text{O}$  and  $\text{Mg}_{0.50}\text{Cu}_{0.25}\text{Zn}_{0.25}\text{O}$  and the reference samples.

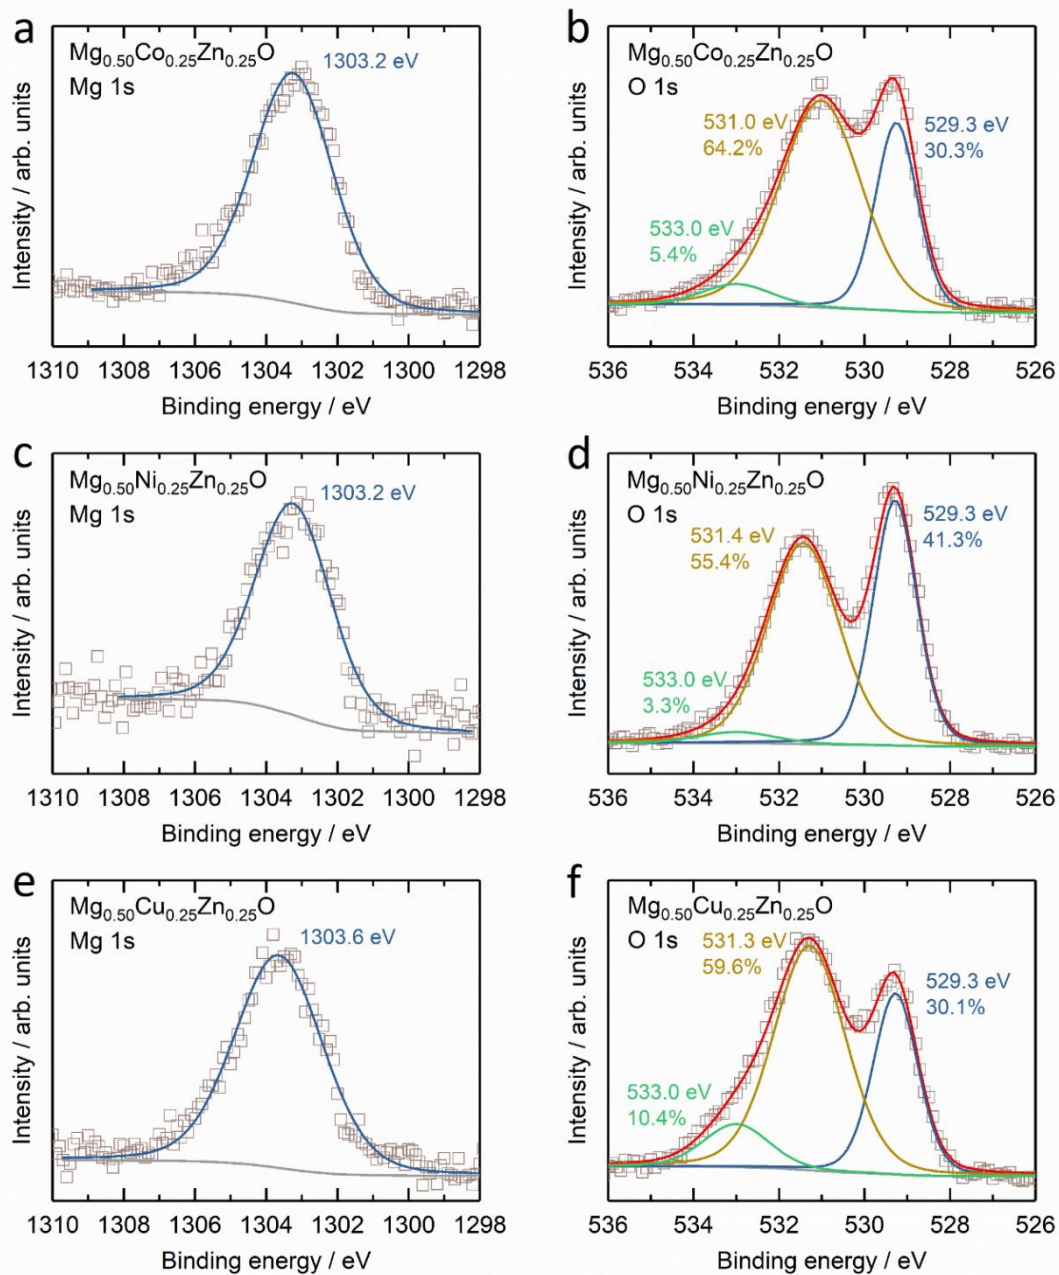

**Fig. S15.** XPS results of (a, c, e) Mg 1s and (b, d, f) O 1s of (a, b)  $\text{Mg}_{0.50}\text{Co}_{0.25}\text{Zn}_{0.25}\text{O}$ , (c, d)  $\text{Mg}_{0.50}\text{Ni}_{0.25}\text{Zn}_{0.25}\text{O}$  and (e, f)  $\text{Mg}_{0.50}\text{Cu}_{0.25}\text{Zn}_{0.25}\text{O}$ .

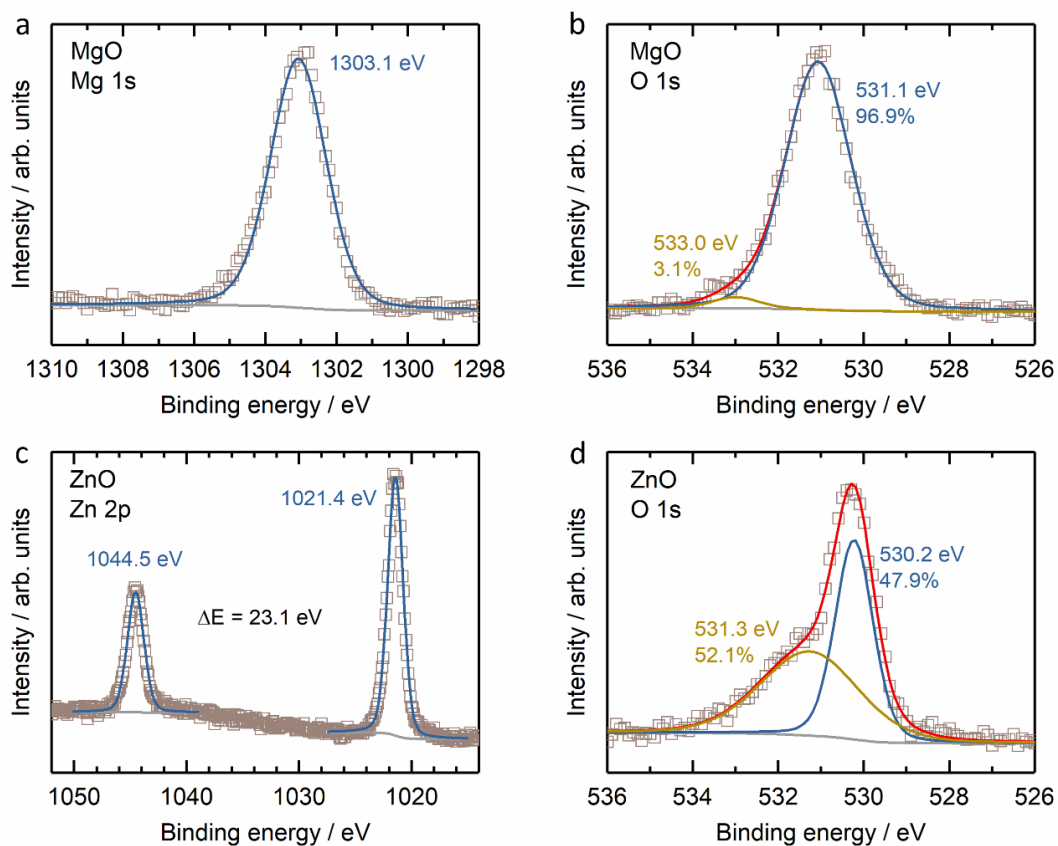

**Fig. S16.** XPS results of (a) Mg 1s, (c) Zn 2p and (b, d) O 1s of commercial (a, b) MgO and (c, d) ZnO.



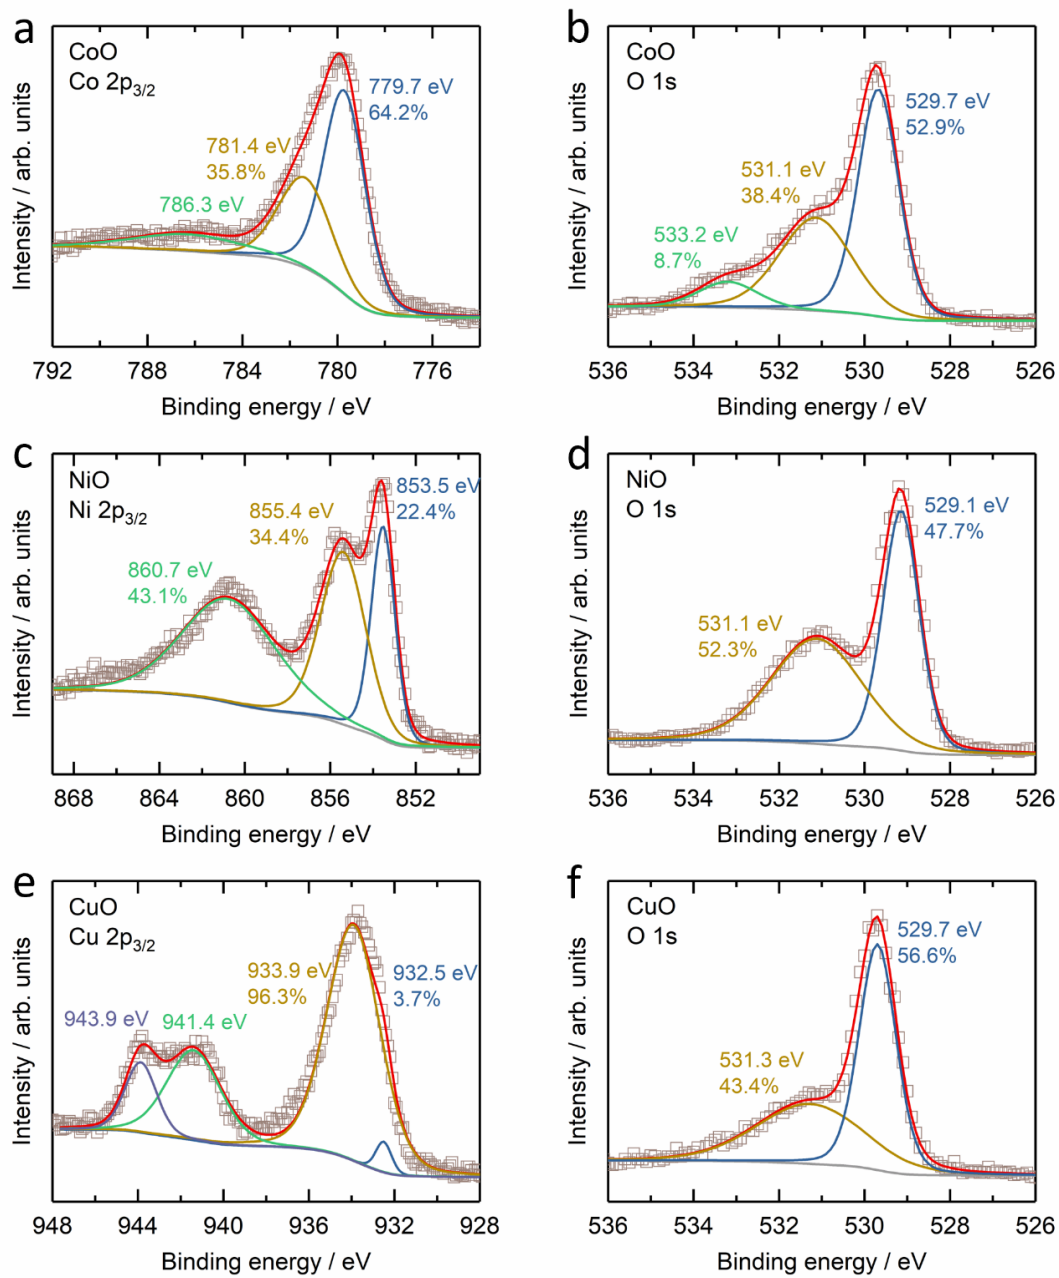

**Fig. S17.** XPS results of (a) Co 2p<sub>3/2</sub>, (c) Ni 2p<sub>3/2</sub>, (e) Cu 2p<sub>3/2</sub> and (b, d, f) O 1s of commercial (a, b) CoO, (c, d) NiO and (e, f) CuO.



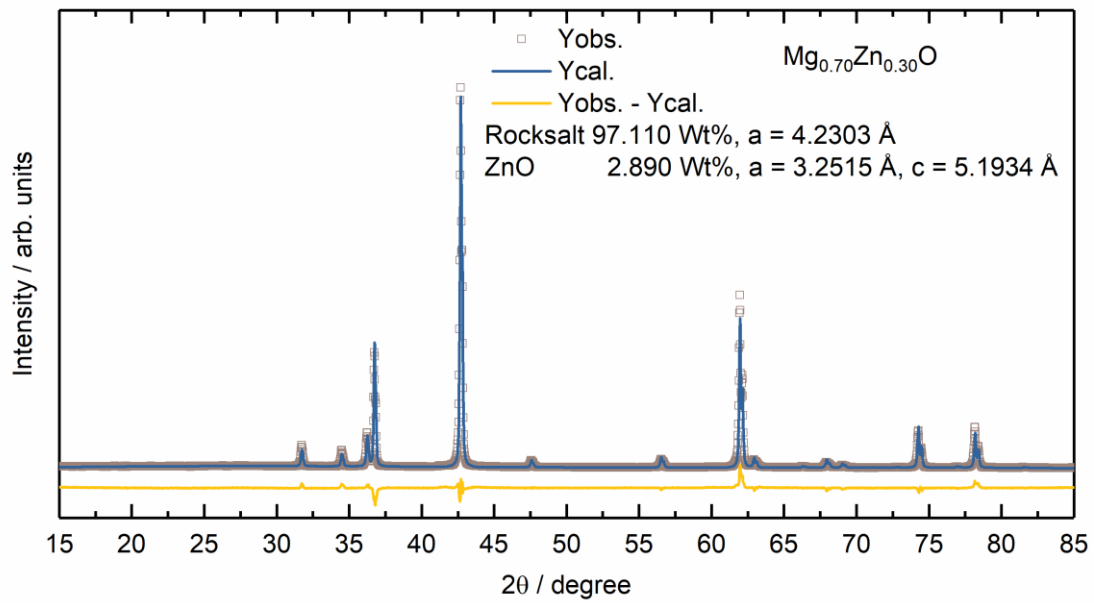

**Fig. S18.** XRD Rietveld refinement of  $Mg_{0.70}Zn_{0.30}O$ .

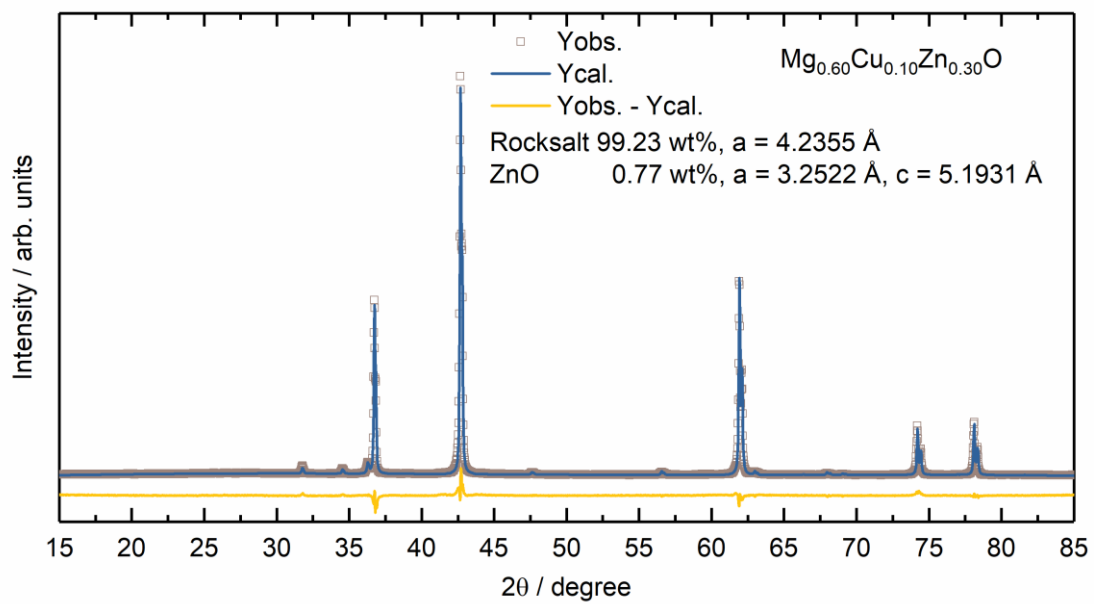

**Fig. S19.** XRD Rietveld refinement of  $Mg_{0.60}Cu_{0.10}Zn_{0.30}O$ .

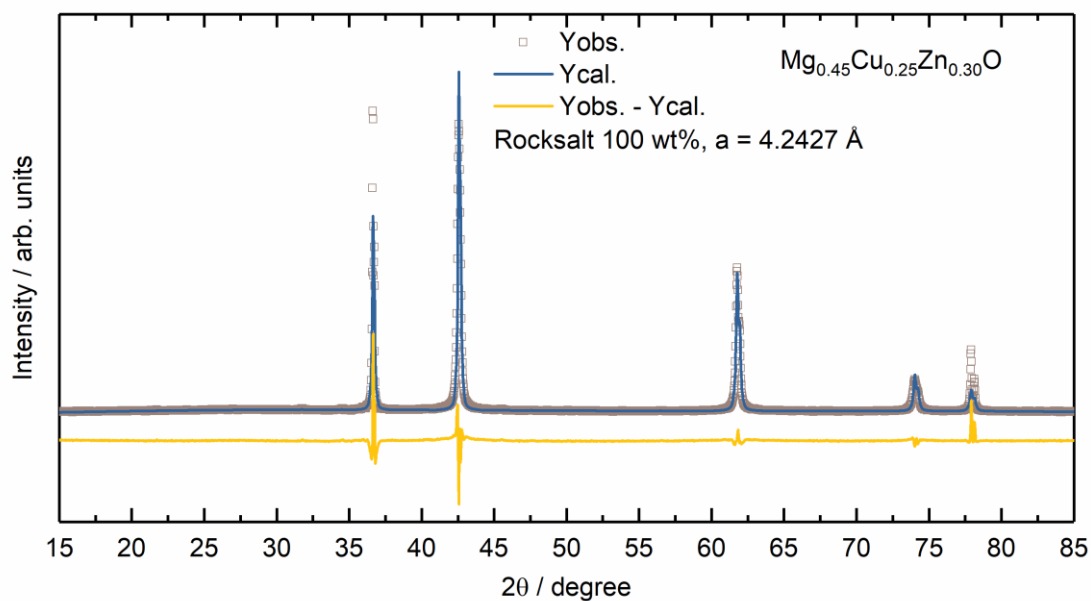

**Fig. S20.** XRD Rietveld refinement of  $\text{Mg}_{0.45}\text{Cu}_{0.25}\text{Zn}_{0.30}\text{O}$ .

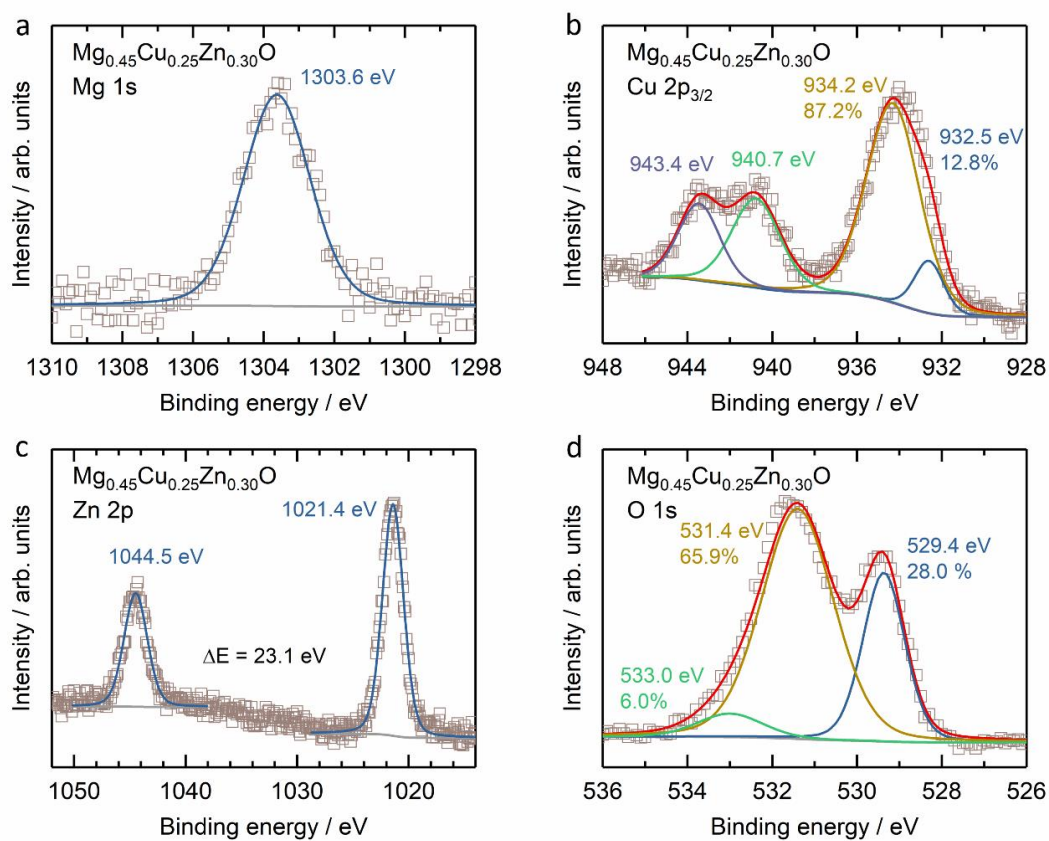

**Fig. S21.** XPS results of (a) Mg 1s, (b) Cu  $2p_{3/2}$ , (c) Zn 2p and (d) O 1s of  $\text{Mg}_{0.45}\text{Cu}_{0.25}\text{Zn}_{0.30}\text{O}$ .

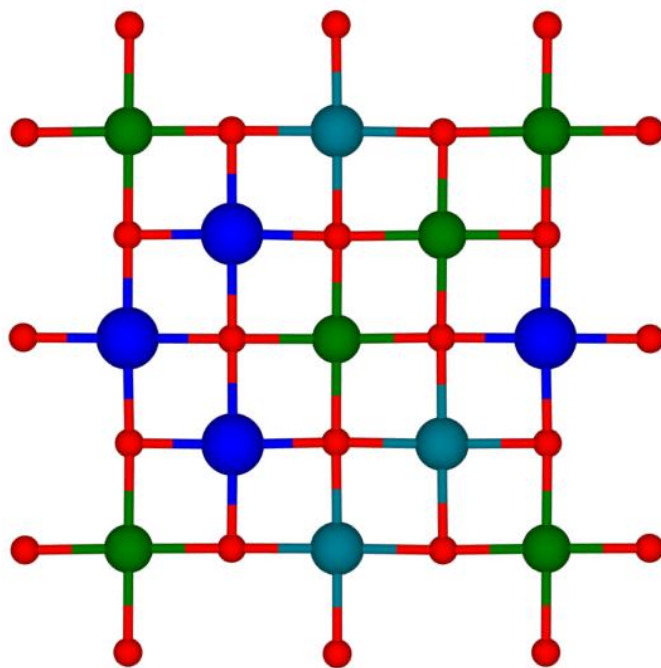

**Fig. S22.** The slice of  $\text{Mg}_{0.50}\text{Ni}_{0.25}\text{Zn}_{0.25}\text{O}$  viewed from  $[001]$  direction.

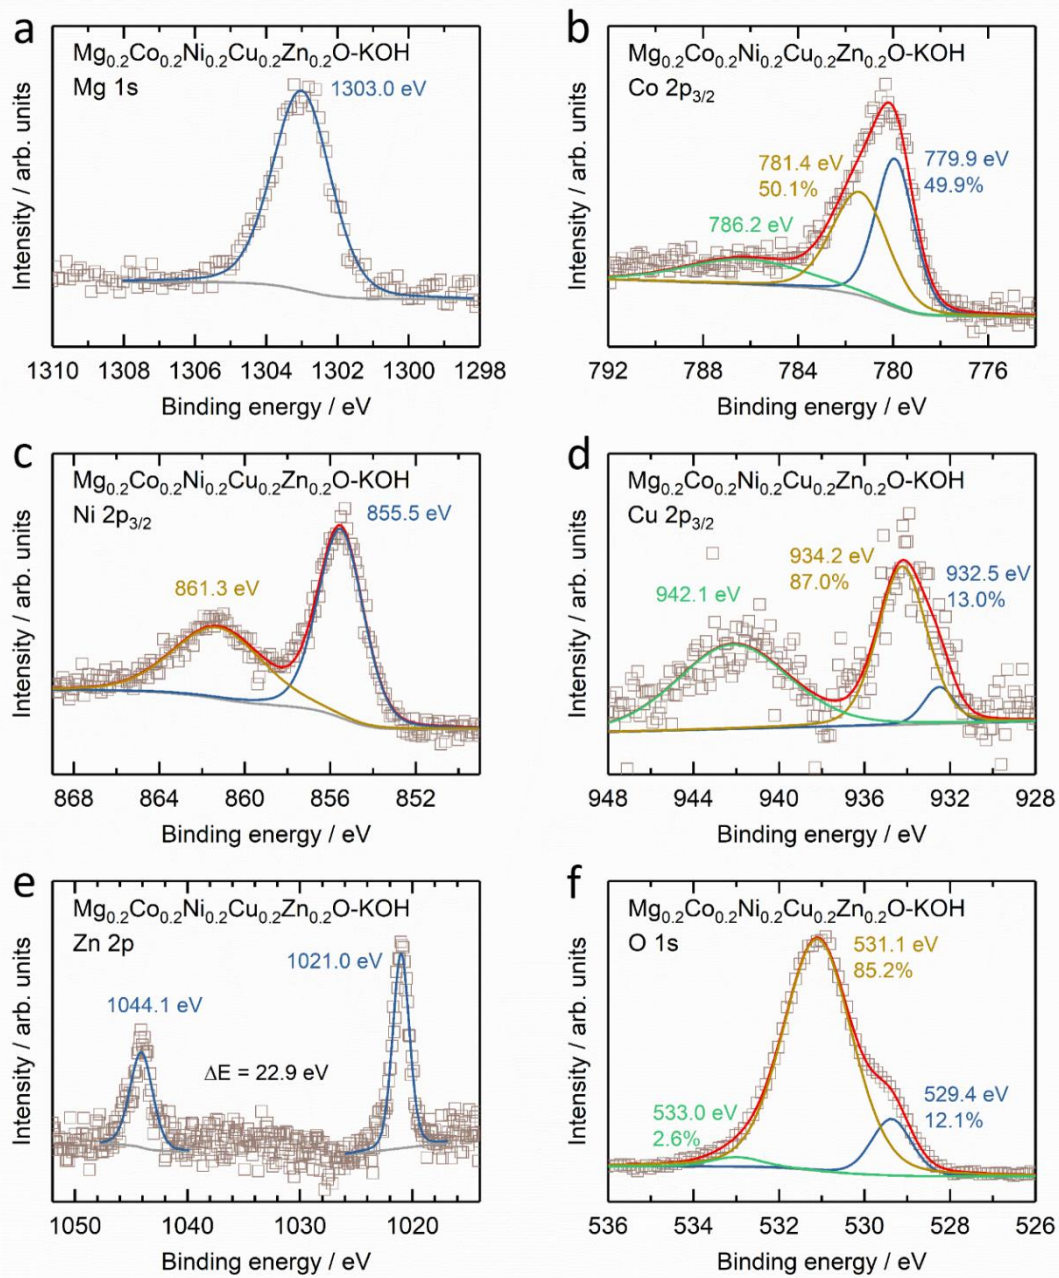

**Fig. S23.** XPS results of (a) Mg 1s, (b) Co 2p<sub>3/2</sub>, (c) Ni 2p<sub>3/2</sub>, (d) Cu 2p<sub>3/2</sub>, (e) Zn 2p and (f) O 1s of  $\text{Mg}_{0.2}\text{Co}_{0.2}\text{Ni}_{0.2}\text{Cu}_{0.2}\text{Zn}_{0.2}\text{O}$  after soaking in 2 M KOH for 4 weeks.

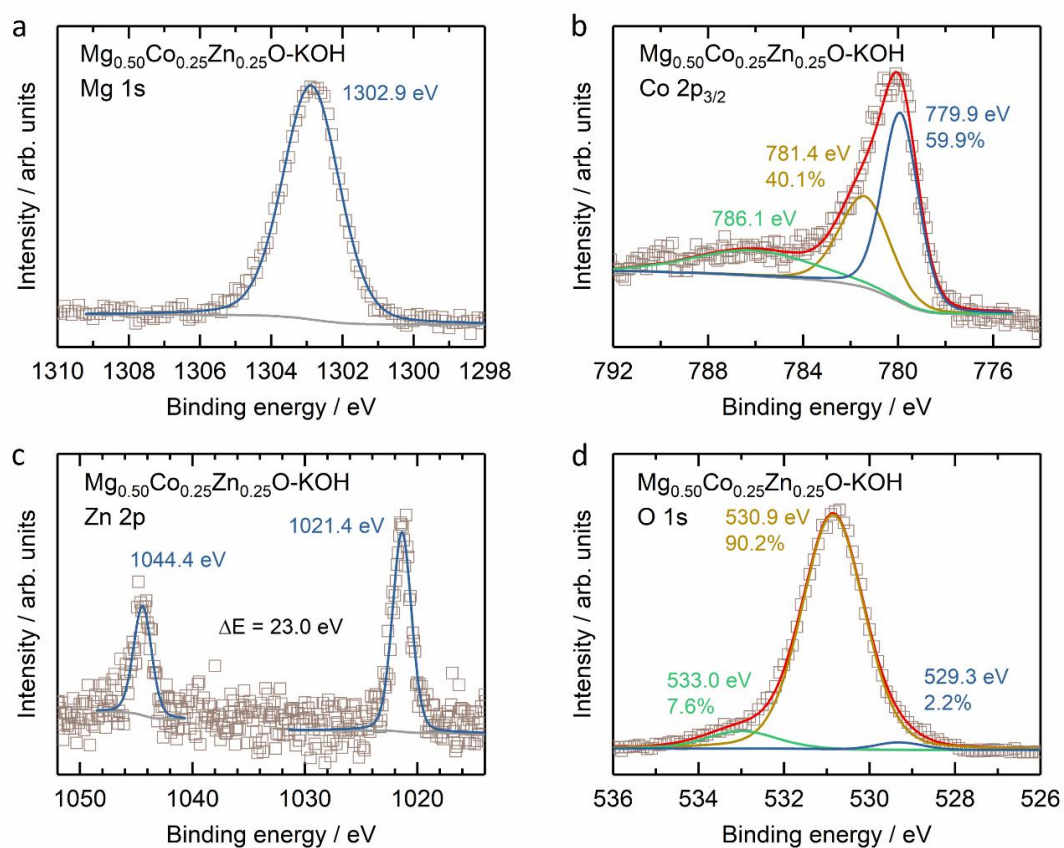

**Fig. S24.** XPS results of (a) Mg 1s, (b) Co 2p<sub>3/2</sub>, (c) Zn 2p and (d) O 1s of Mg<sub>0.50</sub>Co<sub>0.25</sub>Zn<sub>0.25</sub>O after soaking in 2 M KOH for 4 weeks.

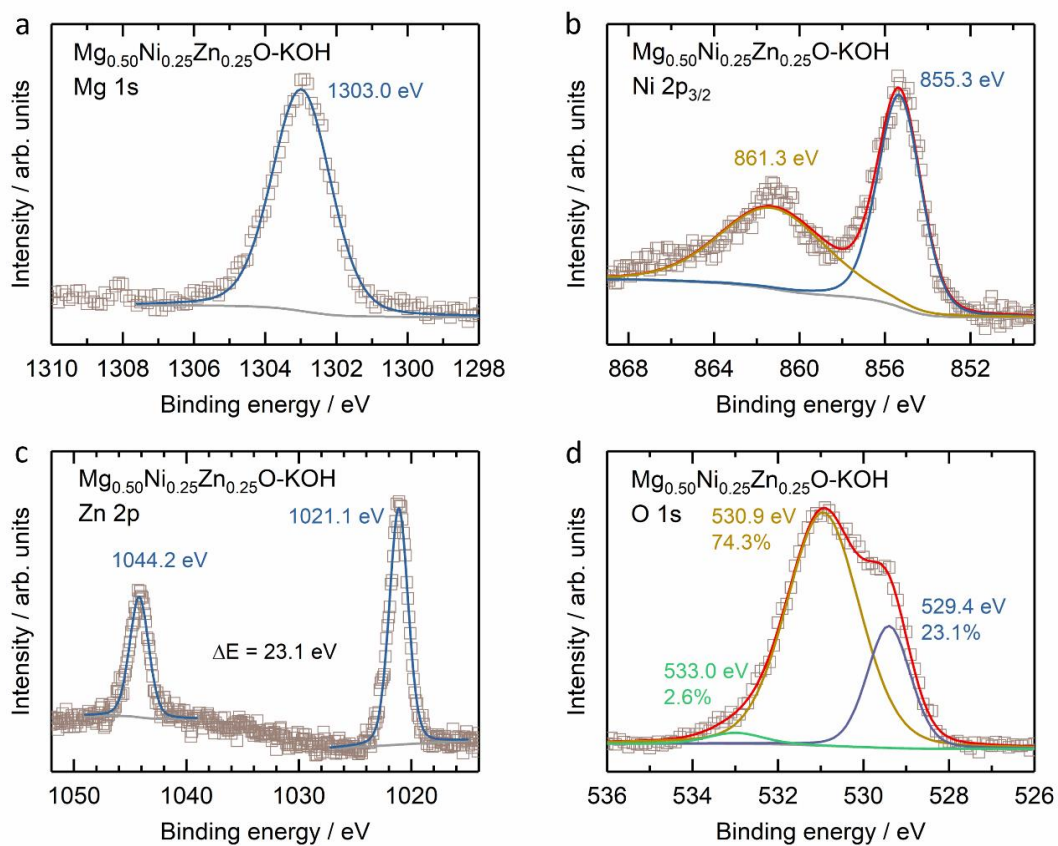

**Fig. S25.** XPS results of (a) Mg 1s, (b) Ni 2p<sub>3/2</sub>, (c) Zn 2p and (d) O 1s of  $\text{Mg}_{0.50}\text{Ni}_{0.25}\text{Zn}_{0.25}\text{O}$  after soaking in 2 M KOH for 4 weeks.



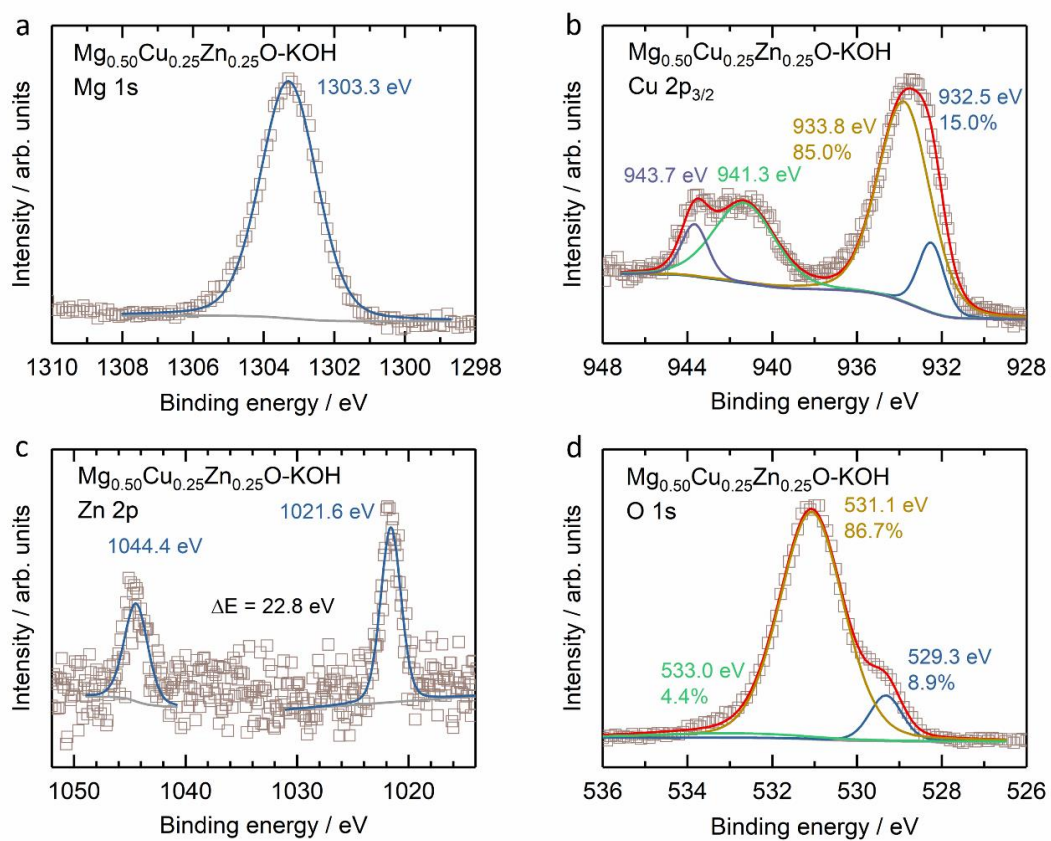

**Fig. S26.** XPS results of (a) Mg 1s, (b) Cu 2p<sub>3/2</sub>, (c) Zn 2p and (d) O 1s of  $\text{Mg}_{0.50}\text{Cu}_{0.25}\text{Zn}_{0.25}\text{O}$  after soaking in 2 M KOH for 4 weeks.

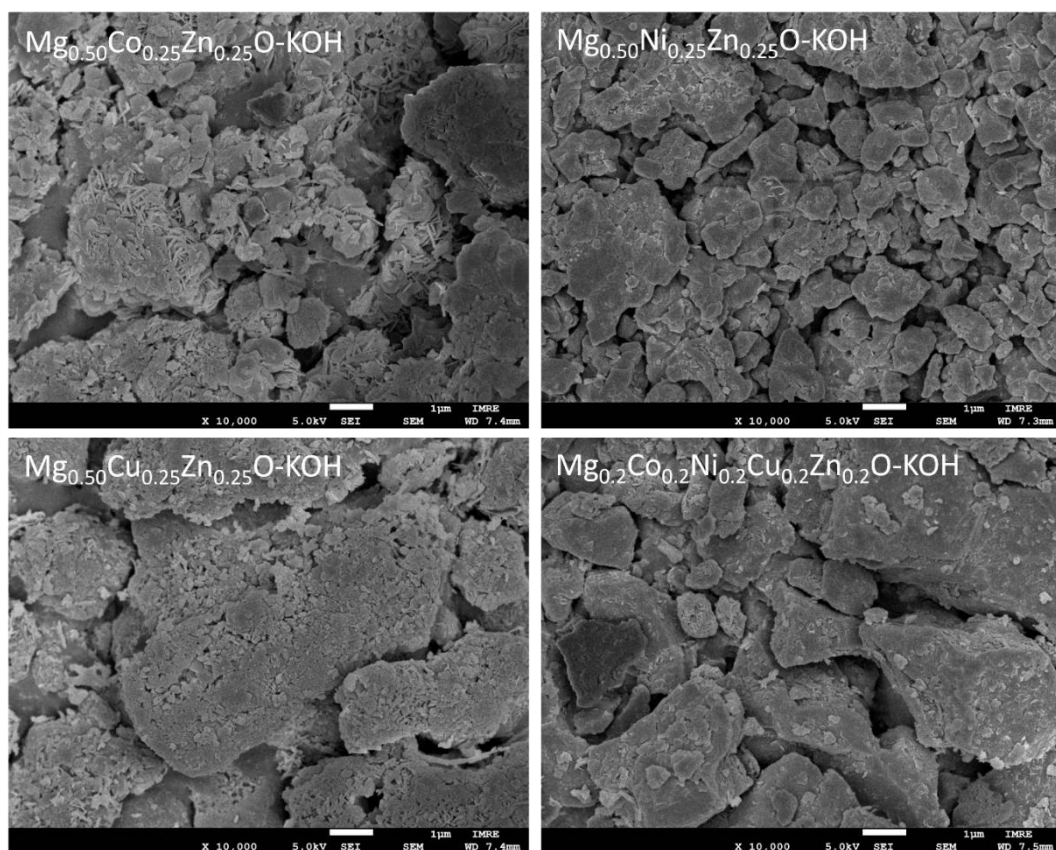

**Fig. S27.** SEM images of  $\text{Mg}_{0.50}\text{TM}_{0.25}\text{Zn}_{0.25}\text{O}$  (TM = Co, Ni, Cu) and  $\text{Mg}_{0.2}\text{Co}_{0.2}\text{Ni}_{0.2}\text{Cu}_{0.2}\text{Zn}_{0.2}\text{O}$  after soaking in 2 M KOH for 4 weeks.

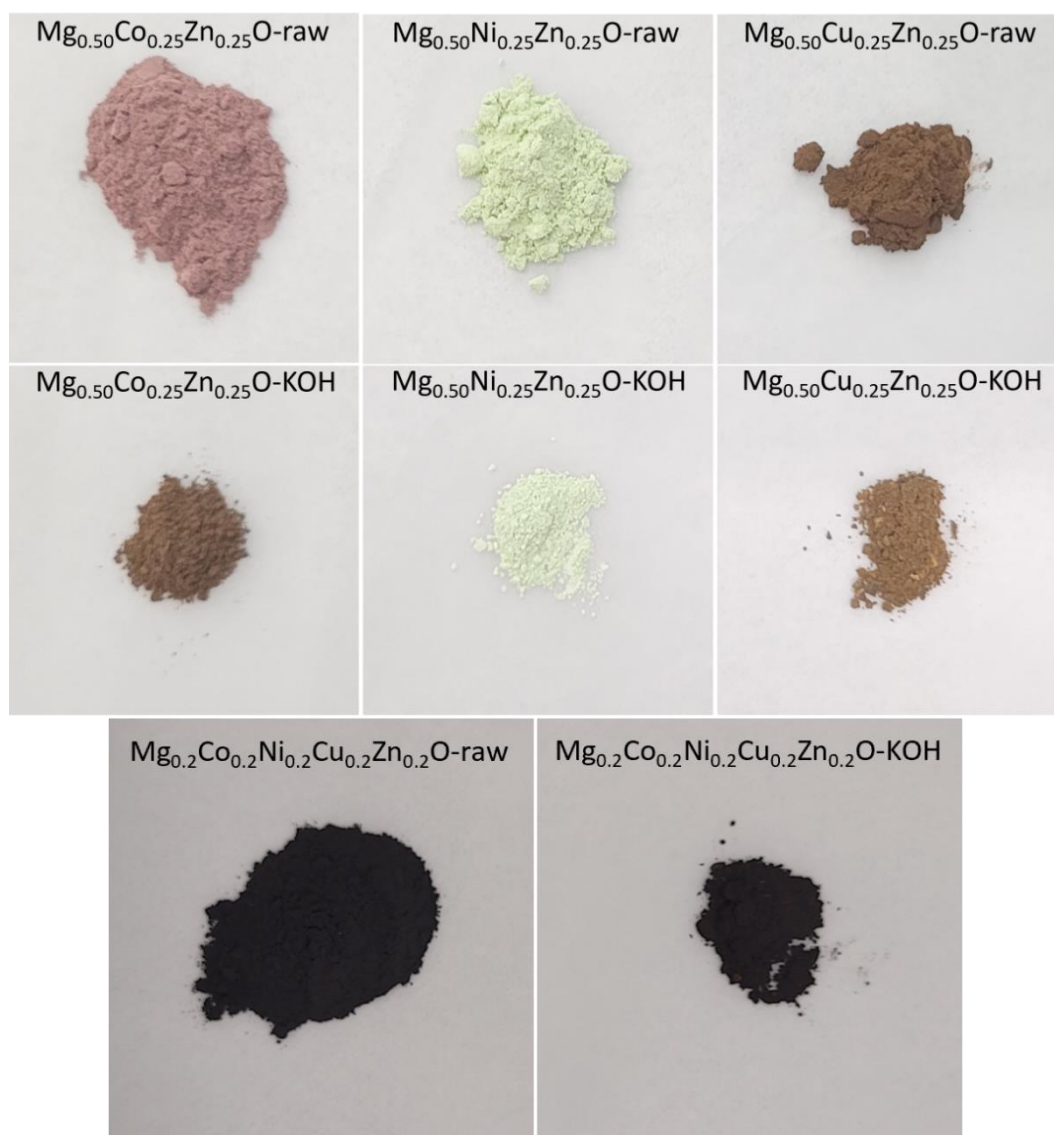

**Fig. S28.** The optical photographs of  $\text{Mg}_{0.50}\text{Co}_{0.25}\text{Zn}_{0.25}\text{O}$ ,  $\text{Mg}_{0.50}\text{Ni}_{0.25}\text{Zn}_{0.25}\text{O}$ ,  $\text{Mg}_{0.50}\text{Cu}_{0.25}\text{Zn}_{0.25}\text{O}$  and  $\text{Mg}_{0.2}\text{Co}_{0.2}\text{Ni}_{0.2}\text{Cu}_{0.2}\text{Zn}_{0.2}\text{O}$  before and after soaking in 2 M KOH for 4 weeks at room temperature under constant stirring. The oxide-raw stands for the raw oxides and the oxide-KOH for the oxide soaked in 2 M KOH for 4 weeks.

**Table S1** EXAFS fitting parameters of  $\text{Mg}_{0.50}\text{TM}_{0.25}\text{Zn}_{0.25}\text{O}$  (TM = Co, Ni, Cu)

| Edge                                                                    | Path     | CN       | $\sigma^2 / \text{\AA}^2$ | $\Delta E_0 / \text{eV}$ | R / $\text{\AA}$ | R-factor |
|-------------------------------------------------------------------------|----------|----------|---------------------------|--------------------------|------------------|----------|
| $\text{Mg}_{0.50}\text{Co}_{0.25}\text{Zn}_{0.25}\text{O}$<br>Zn K-edge | Zn-O     | 5.6(0.4) | 0.0081(0.0011)            | 5.63(0.78)               | 2.13(0.01)       | 0.003    |
|                                                                         | Zn-Mg    | 8.1(0.9) | 0.0050(0.0013)            | 7.37(1.19)               | 2.99(0.02)       |          |
|                                                                         | Zn-Co/Zn | 0.2(0.1) | 0.0050(0.0013)            | 7.37(1.19)               | 2.99(0.01)       |          |
| $\text{Mg}_{0.50}\text{Co}_{0.25}\text{Zn}_{0.25}\text{O}$<br>Co K-edge | Co-O     | 6.4(0.3) | 0.0063(0.0007)            | 2.33(0.62)               | 2.12(0.01)       | 0.0004   |
|                                                                         | Co-Mg    | 9.6(0.6) | 0.0044(0.0006)            | 4.15(0.69)               | 2.98(0.01)       |          |
|                                                                         | Co-Co/Zn | 2.8(0.6) | 0.0044(0.0006)            | 4.15(0.69)               | 2.98(0.01)       |          |
| $\text{Mg}_{0.50}\text{Ni}_{0.25}\text{Zn}_{0.25}\text{O}$<br>Zn K-edge | Zn-O     | 5.7(0.5) | 0.0078(0.0012)            | 5.59(0.88)               | 2.12(0.01)       | 0.003    |
|                                                                         | Zn-Mg    | 7.9(0.9) | 0.0054(0.0013)            | 6.81(1.31)               | 2.96(0.02)       |          |
|                                                                         | Zn-Ni/Zn | 2.0(1.0) | 0.0054(0.0013)            | 6.81(1.31)               | 2.98(0.01)       |          |
| $\text{Mg}_{0.50}\text{Ni}_{0.25}\text{Zn}_{0.25}\text{O}$<br>Ni K-edge | Ni-O     | 6.2(0.4) | 0.0060(0.0007)            | 0.44(0.67)               | 2.10(0.01)       | 0.001    |
|                                                                         | Ni-Mg    | 8.1(0.8) | 0.0043(0.0008)            | 3.21(1.09)               | 2.96(0.02)       |          |
|                                                                         | Ni-Ni/Zn | 2.3(0.9) | 0.0043(0.0008)            | 3.21(1.09)               | 2.97(0.01)       |          |
| $\text{Mg}_{0.50}\text{Cu}_{0.25}\text{Zn}_{0.25}\text{O}$<br>Zn K-edge | Zn-O     | 5.7(0.5) | 0.0099(0.0015)            | 4.92(0.95)               | 2.12(0.01)       | 0.003    |
|                                                                         | Zn-Mg    | 7.9(1.4) | 0.0073(0.0015)            | 6.89(1.39)               | 2.98(0.02)       |          |
|                                                                         | Zn-Cu/Zn | 2.1(1.1) | 0.0073(0.0015)            | 6.89(1.39)               | 3.00(0.01)       |          |
| $\text{Mg}_{0.50}\text{Cu}_{0.25}\text{Zn}_{0.25}\text{O}$<br>Cu K-edge | Cu-O     | 3.1(0.6) | 0.0067(0.0025)            | 0.00(2.44)               | 2.00(0.02)       | 0.012    |
|                                                                         | Cu-Mg    | 6.1(1.3) | 0.0054(0.0026)            | 6.43(2.12)               | 2.97(0.02)       |          |
|                                                                         | Cu-Cu/Zn | 1.2(0.5) | 0.0054(0.0026)            | 6.43(2.12)               | 2.99(0.02)       |          |

Note: CN, coordination number;  $\sigma^2$ , Debye-Waller factor to account for both thermal and structure disorder;  $\Delta E_0$ , inner potential correction; R, distance between absorber and backscatter atoms; R-factor indicates the goodness to the fit. The amplitude reduction factor  $S_0^2$  was fixed to 0.98 for Zn, 0.76 for Co, 0.89 for Ni and 0.89 for Cu. Fitting range: Zn K-edge  $3.0 \leq k (\text{\AA}^{-1}) \leq 13$  and  $1.0 \leq R (\text{\AA}) \leq 3.2$ ; Co K-edge  $3.0 \leq k (\text{\AA}^{-1}) \leq 11.939$  and  $1.0 \leq R (\text{\AA}) \leq 3.2$ ; Ni K-edge  $3.0 \leq k (\text{\AA}^{-1}) \leq 12.896$  and  $1.0 \leq R (\text{\AA}) \leq 3.15$ ; Cu K-edge  $2.5 \leq k (\text{\AA}^{-1}) \leq 12$  and  $1.0 \leq R (\text{\AA}) \leq 3.3$ .

**Table S2** EXAFS fitting parameters of  $\text{Mg}_{0.50}\text{TM}_{0.25}\text{Zn}_{0.25}\text{O}$  (TM = Co, Ni, Cu), fixing the coordination number to 6 for the first shell and 12 for the second shell.

| Edge                                                                    | Path     | CN        | $\sigma^2 / \text{\AA}^2$ | $\Delta E_0 / \text{eV}$ | $R / \text{\AA}$ | R-factor |
|-------------------------------------------------------------------------|----------|-----------|---------------------------|--------------------------|------------------|----------|
| $\text{Mg}_{0.50}\text{Co}_{0.25}\text{Zn}_{0.25}\text{O}$<br>Zn K-edge | Zn-O     | 6         | 0.0088(0.0008)            | 7.40(0.88)               | 2.14(0.010)      | 0.008    |
|                                                                         | Zn-Mg    | 11.5(0.1) | 0.0076(0.0012)            | 8.10(1.16)               | 3.02(0.019)      |          |
|                                                                         | Zn-Co/Zn | 0.5(0.1)  | 0.0076(0.0012)            | 8.10(1.16)               | 3.01(0.012)      |          |
| $\text{Mg}_{0.50}\text{Co}_{0.25}\text{Zn}_{0.25}\text{O}$<br>Co K-edge | Co-O     | 6         | 0.0056(0.0004)            | 2.10(0.66)               | 2.12(0.006)      | 0.002    |
|                                                                         | Co-Mg    | 9.4(0.2)  | 0.0040(0.0013)            | 4.62(0.80)               | 2.98(0.011)      |          |
|                                                                         | Co-Co/Zn | 2.6(0.2)  | 0.0040(0.0013)            | 4.62(0.80)               | 2.98(0.011)      |          |
| $\text{Mg}_{0.50}\text{Ni}_{0.25}\text{Zn}_{0.25}\text{O}$<br>Zn K-edge | Zn-O     | 6         | 0.0085(0.0005)            | 6.19(0.68)               | 2.13(0.007)      | 0.002    |
|                                                                         | Zn-Mg    | 9.0(0.3)  | 0.0068(0.0008)            | 6.87(0.81)               | 2.97(0.008)      |          |
|                                                                         | Zn-Ni/Zn | 3.0(0.3)  | 0.0068(0.0008)            | 6.87(0.81)               | 2.97(0.005)      |          |
| $\text{Mg}_{0.50}\text{Ni}_{0.25}\text{Zn}_{0.25}\text{O}$<br>Ni K-edge | Ni-O     | 6         | 0.0056(0.0003)            | 0.88(0.50)               | 2.10(0.004)      | 0.002    |
|                                                                         | Ni-Mg    | 8.9(0.2)  | 0.0045(0.0006)            | 4.14(0.59)               | 2.97(0.008)      |          |
|                                                                         | Ni-Ni/Zn | 3.1(0.2)  | 0.0045(0.0006)            | 4.14(0.59)               | 2.97(0.005)      |          |
| $\text{Mg}_{0.50}\text{Cu}_{0.25}\text{Zn}_{0.25}\text{O}$<br>Zn K-edge | Zn-O     | 6         | 0.0102(0.0011)            | 7.40(1.32)               | 2.14(0.015)      | 0.02     |
|                                                                         | Zn-Mg    | 9.7(0.4)  | 0.0073(0.0020)            | 1.34(1.16)               | 2.88(0.016)      |          |
|                                                                         | Zn-Cu/Zn | 2.3(0.4)  | 0.0073(0.0020)            | 1.34(1.16)               | 2.75(0.021)      |          |
| $\text{Mg}_{0.50}\text{Cu}_{0.25}\text{Zn}_{0.25}\text{O}$<br>Cu K-edge | Cu-O1    | 4         | 0.0079(0.0007)            | 6.31(1.24)               | 2.02(0.010)      | 0.003    |
|                                                                         | Cu-O2    | 2         | 0.0173(0.0030)            | 6.31(1.24)               | 2.28(0.019)      |          |
|                                                                         | Cu-Mg    | 8.7(0.3)  | 0.0086(0.0008)            | 3.97(1.06)               | 2.97(0.012)      |          |
|                                                                         | Cu-Cu/Zn | 3.3(0.3)  | 0.0086(0.0008)            | 3.97(1.06)               | 2.99(0.008)      |          |

Note: CN, coordination number;  $\sigma^2$ , Debye-Waller factor to account for both thermal and structure disorder;  $\Delta E_0$ , inner potential correction; R, distance between absorber and backscatter atoms; R-factor indicates the goodness to the fit. The amplitude reduction factor  $S_0^2$  was fixed to 0.98 for Zn, 0.76 for Co, 0.89 for Ni and 0.89 for Cu. Fitting range: Zn K-edge  $3.0 \leq k (\text{\AA}^{-1}) \leq 13$  and  $1.0 \leq R (\text{\AA}) \leq 3.2$ ; Co K-edge  $3.0 \leq k (\text{\AA}^{-1}) \leq 11.939$  and  $1.0 \leq R (\text{\AA}) \leq 3.2$ ; Ni K-edge  $3.0 \leq k (\text{\AA}^{-1}) \leq 12.896$  and  $1.0 \leq R (\text{\AA}) \leq 3.15$ ; Cu K-edge  $3.0 \leq k (\text{\AA}^{-1}) \leq 12$  and  $1.0 \leq R (\text{\AA}) \leq 3.3$ .

**Table S3** SEM-EDX results of the metal element ratios in  $\text{Mg}_{0.50}\text{Co}_{0.25}\text{Zn}_{0.25}\text{O}$ .

|         | Mg   | Co   | Zn   |
|---------|------|------|------|
| 1       | 54.1 | 22.7 | 23.2 |
| 2       | 49   | 24.9 | 26.1 |
| 3       | 44.9 | 27.4 | 27.7 |
| Average | 49.3 | 25.0 | 25.7 |
| SD      | 3.76 | 1.92 | 1.86 |

Note: SD stands for standard deviation. It also applicable to Table S3-S9.

**Table S4** SEM-EDX results of the metal element ratios in  $\text{Mg}_{0.50}\text{Ni}_{0.25}\text{Zn}_{0.25}\text{O}$ .

|         | Mg   | Ni   | Zn   |
|---------|------|------|------|
| 1       | 46.6 | 26.6 | 26.8 |
| 2       | 50.1 | 25   | 24.9 |
| 3       | 49.9 | 24.9 | 25.2 |
| Average | 48.9 | 25.5 | 25.6 |
| SD      | 1.60 | 0.78 | 0.83 |

**Table S5** SEM-EDX results of the metal element ratios in  $\text{Mg}_{0.50}\text{Cu}_{0.25}\text{Zn}_{0.25}\text{O}$ .

|         | Mg   | Cu   | Zn   |
|---------|------|------|------|
| 1       | 56.4 | 20.9 | 22.7 |
| 2       | 52.3 | 24.3 | 23.4 |
| 3       | 49.9 | 25.2 | 25.0 |
| Average | 52.9 | 23.5 | 23.7 |
| SD      | 2.68 | 1.85 | 0.96 |

**Table S6** SEM-EDX results of the metal element ratios in  $\text{Mg}_{0.20}\text{Co}_{0.20}\text{Ni}_{0.20}\text{Cu}_{0.20}\text{Zn}_{0.20}\text{O}$ .

|         | Mg    | Co    | Ni    | Cu    | Zn    |
|---------|-------|-------|-------|-------|-------|
| 1       | 18.7  | 18.9  | 17.9  | 22.3  | 22.3  |
| 2       | 16.4  | 22.6  | 21.2  | 20.3  | 19.6  |
| 3       | 18.2  | 18.7  | 19    | 22.1  | 22    |
| 4       | 17    | 21.1  | 20.6  | 20.4  | 21    |
| 5       | 19.7  | 18    | 17.3  | 22.5  | 22.4  |
| 6       | 16.1  | 22.4  | 21.5  | 20.6  | 19.4  |
| 7       | 18.2  | 17.9  | 17.2  | 23.8  | 22.9  |
| 8       | 21.6  | 16.3  | 16.3  | 22.6  | 23.2  |
| 9       | 18.1  | 20.7  | 20.2  | 20.9  | 20.2  |
| Average | 18.22 | 19.62 | 19.02 | 21.72 | 21.44 |
| SD      | 1.60  | 2.05  | 1.82  | 1.15  | 1.35  |



**Table S7** SEM-EDX results of the metal element ratios in  $\text{Mg}_{0.50}\text{Co}_{0.25}\text{Zn}_{0.25}\text{O}$  soaking in 2 M KOH for 4 weeks.

|         | Mg    | Co    | Zn   | K    |
|---------|-------|-------|------|------|
| 1       | 52.6  | 39    | 8.3  | 0.1  |
| 2       | 58    | 35.2  | 5.8  | 0    |
| 3       | 58.2  | 33.6  | 8.1  | 0.1  |
| 4       | 59.8  | 31.4  | 8.8  | 0    |
| 5       | 58.1  | 34.2  | 7.7  | 0    |
| 6       | 61.5  | 31    | 7.5  | 0.1  |
| 7       | 62.2  | 29.1  | 8.7  | 0    |
| 8       | 61.9  | 30.9  | 7.1  | 0.1  |
| 9       | 59.3  | 33.8  | 6.9  | 0    |
| 10      | 63.7  | 30.2  | 6.1  | 0    |
| Average | 59.53 | 32.84 | 7.5  | 0.04 |
| SD      | 2.97  | 2.78  | 0.98 | 0.05 |

**Table S8** SEM-EDX results of the metal element ratios in  $\text{Mg}_{0.50}\text{Ni}_{0.25}\text{Zn}_{0.25}\text{O}$  soaking in 2 M KOH for 4 weeks.

|         | Mg    | Ni    | Zn    | K    |
|---------|-------|-------|-------|------|
| 1       | 50.8  | 25.2  | 24.1  | 0    |
| 2       | 51.2  | 26    | 22.8  | 0.1  |
| 3       | 50.1  | 26.9  | 23    | 0    |
| 4       | 49.5  | 27.4  | 23    | 0    |
| 5       | 49.4  | 27    | 23.5  | 0.1  |
| 6       | 49.9  | 26.3  | 23.8  | 0    |
| 7       | 49.8  | 26.6  | 23.3  | 0.2  |
| 8       | 49.1  | 27.3  | 23.5  | 0.1  |
| Average | 49.98 | 26.59 | 23.38 | 0.06 |
| SD      | 0.67  | 0.69  | 0.41  | 0.07 |

**Table S9** SEM-EDX results of the metal element ratios in  $\text{Mg}_{0.50}\text{Cu}_{0.25}\text{Zn}_{0.25}\text{O}$  soaking in 2 M KOH for 4 weeks.

|         | Mg    | Cu    | Zn   | K    |
|---------|-------|-------|------|------|
| 1       | 63.6  | 29.5  | 6.9  | 0    |
| 2       | 63.9  | 28.5  | 7.6  | 0    |
| 3       | 68.3  | 20.8  | 10.8 | 0.1  |
| 4       | 75.2  | 17.2  | 7    | 0    |
| 5       | 75.2  | 13.1  | 11.7 | 0    |
| 6       | 73    | 16.9  | 10   | 0.1  |
| 7       | 74.6  | 15.5  | 10   | 0    |
| 8       | 65.6  | 25.2  | 9.3  | 0    |
| 9       | 74.5  | 13.9  | 11.6 | 0    |
| 10      | 72.9  | 15.8  | 11.3 | 0    |
| Average | 70.68 | 19.64 | 9.62 | 0.02 |
| SD      | 4.57  | 5.74  | 1.77 | 0.04 |

**Table S10** SEM-EDX results of the metal element ratios in  $\text{Mg}_{0.20}\text{Co}_{0.20}\text{Ni}_{0.20}\text{Cu}_{0.20}\text{Zn}_{0.20}\text{O}$  soaking in 2 M KOH for 4 weeks.

|         | Mg    | Co   | Ni    | Cu    | Zn    | K    |
|---------|-------|------|-------|-------|-------|------|
| 1       | 20.8  | 19.6 | 19.5  | 19.4  | 20.5  | 0.1  |
| 2       | 21.3  | 18.9 | 19    | 20.3  | 20.6  | 0    |
| 3       | 17    | 22   | 21.6  | 19.9  | 19.5  | 0    |
| 4       | 19.5  | 20.3 | 20    | 19.7  | 20.3  | 0    |
| 5       | 18.2  | 21.7 | 21.6  | 19.4  | 19.1  | 0    |
| 6       | 21.2  | 21.9 | 20.3  | 17.3  | 19.3  | 0    |
| 7       | 19.9  | 19.2 | 19.1  | 20.2  | 21.7  | 0    |
| 8       | 18.6  | 20.9 | 20.1  | 19.6  | 20.5  | 0.3  |
| 9       | 18.6  | 20.9 | 19.9  | 20.1  | 20.4  | 0    |
| 10      | 19    | 19.6 | 20    | 19.9  | 21.5  | 0    |
| average | 19.41 | 20.5 | 20.11 | 19.58 | 20.34 | 0.04 |
| SD      | 1.33  | 1.09 | 0.85  | 0.82  | 0.82  | 0.09 |
